# Supplementary material
Source: publisher site journal article supplement (https://www.kjim.org/upload/media/kjim-2021-101-suppl3.pdf)
Supplement: Supplementary file 1 [file kjim-2021-101-suppl3.pdf]

**Supplementary Table 3. Clinical progress summaries of patients with both ischemic and bleeding events before or after P2Y12RI switching**

| Patient | Age/sex | Pattern of switching           | Clinical courses                                                                                                                                                                  |
|---------|---------|--------------------------------|-----------------------------------------------------------------------------------------------------------------------------------------------------------------------------------|
| 1       | 68/F    | From ticagrelor to clopidogrel | Performed PCI with ticagrelor 6 days ago and minor bleeding developed, so patient was switched to clopidogrel MD, and then stroke developed 10 days later.                        |
| 2       | 55/M    | From ticagrelor to clopidogrel | Performed PCI with ticagrelor and minor bleeding developed after PCI, so patient was switched to clopidogrel MD, and then cardiac death developed 8 days later.                   |
| 3       | 79/M    | From ticagrelor to clopidogrel | Performed PCI with ticagrelor 5 days ago and patient was switched to clopidogrel MD, and then minor bleeding developed 3 days later and cardiac death 5 days later.               |
| 4       | 89/F    | From ticagrelor to clopidogrel | Performed PCI with ticagrelor 7 days ago and patient was switched to clopidogrel MD, and then, both minor bleeding and cardiac death developed 2 days later.                      |
| 5       | 80/F    | From ticagrelor to clopidogrel | Performed PCI with ticagrelor 1 day ago and patient was switched to clopidogrel LD followed by MD, and then, both minor bleeding and cardiac death developed 2 days later.        |
| 6       | 60/M    | From prasugrel to clopidogrel  | Performed PCI with prasugrel 6 days ago and minor bleeding developed, so patient was switched to clopidogrel LD followed by MD, and then, cardiac death developed 7 days later.   |
| 7       | 46/M    | From prasugrel to clopidogrel  | Performed PCI with prasugrel 1 day ago and major bleeding developed, so patient was switched to clopidogrel MD, and then, cardiac death developed 4 days later.                   |
| 8       | 45/M    | From clopidogrel to ticagrelor | Performed PCI with clopidogrel 10 days ago and minor bleeding developed 6 days ago, and myocardial infarction developed 2 days ago, so patient was switched to ticagrelor MD.     |
| 9       | 68/M    | From clopidogrel to ticagrelor | Performed PCI with clopidogrel 5 days ago and minor bleeding developed 1 day after PCI, so patient was switched to ticagrelor MD, and then, cardiac death developed 4 days later. |
| 10      | 84/F    | From clopidogrel to prasugrel  | Performed PCI with clopidogrel 4 days ago and patient was switched to prasugrel MD, and then, cerebral hemorrhage developed 3 days later.                                         |
| 11      | 50/M    | From clopidogrel to prasugrel  | Performed PCI with clopidogrel 1 day ago and minor bleeding developed, so patient was switched to prasugrel MD, and then, stroke developed 3 days later.                          |
| 12      | 73/M    | From clopidogrel to prasugrel  | Performed PCI with clopidogrel 1 day ago and myocardial infarction developed, so patient was switched to prasugrel MD, and then, minor bleeding developed 1 day later.            |

RI, receptor inhibitor; PCI, percutaneous coronary intervention; MD, maintenance dose; LD, loading dose.
